# Supplementary material for: The Involvement of Wheat F-Box Protein Gene TaFBA1 in the Oxidative Stress Tolerance of Plants
Source: PLoS One. 2015 Apr 23;10(4):e0122117. doi: 10.1371/journal.pone.0122117 (PMC4408080; doi:10.1371/journal.pone.0122117)
Supplement: S1 File — (XLS) [file pone.0122117.s001.xls]

## Sheet: Sheet1
Expression of TaFBA1 in wheat		CK		10 μM MV
	0 h	1	0.12	1	0.17
	2 h	0.6454	0.17	1.0382	0.13
	4 h	0.7446	0.09	1.2134	0.19
	6 h	0.7704	0.137	1.9682	0.16
	12 h	0.9067	0.21	2.3904	0.24
	24 h	0.9782	0.18	2.0263	0.18
Germination rate	WT		OE-3		OE-5		OE-6
10 d	4.69	0.6532	10.72	0.6876	12.38	0.7231	13.29	0.6162
12 d	17.38	0.6233	26.32	1.8786	29.46	1.0827	30.45	1.3242
14 d	38.56	2.3241	58.4346	2.4682	52.88	2.457	61.22	2.6821
16 d	62.42	3.5856	82.44	3.5262	90.33	3.4321	92.56	3.6268
18 d	75.49	3.6273	92.31	3.4926	95.46	3.8821	96.81	3.7274
Root length	WT		OE-3		OE-5		OE-6
0 μM	4.43	0.3274	4.4	0.2673	4.26	0.2923	4.48	0.3244
5 μM	1.82	0.1234	2.53	0.2824	2.85	0.2862	2.44	0.2468
10 μM	0.96	0.1345	1.92	0.2478	1.98	0.2287	1.86	0.2832
Fresh weight (mg /plant)	WT		OE-3		OE-5
CK	18	0.48	20	0.61	17	0.59
10 μM MV	7	0.39	12	0.48	11	0.41
Malondialdehyde (MDA) content	WT		OE-3		OE-5
0 mM MV	3.65	0.3943	3.68	0.2872	3.62	0.2359
50 mM MV	8.64	0.6249	6.43	0.3428	6.93	0.6393
100 mM MV	14.93	0.9428	8.38	0.4921	9.05	0.6828
Chlorophyll (a+b) content	WT		OE-3		OE-5
0 mM MV	2.74	0.1932	2.82	0.1871	2.69	0.1982
50 mM MV	0.78	0.0631	1.69	0.1182	1.78	0.0965
100 mM MV	0.39	0.0494	1.04	0.0558	1.29	0.0632
Relative electrical conductivity (%)	WT		OE-3		OE-5
0 mM MV	24.6947	3.03619	31.1663	3.48277	28.5762	3.88302
50 mM MV	47.6572	2.72465	36.4635	2.54573	35.5444	3.46546
100 mM MV	58.2442	3.62374	43.54	3.75439	40.1382	4.37858
H2O2 content	WT		OE-3		OE-5		OE-6
0 μM	12.48	0.83	12.89	0.87	12.22	0.78	13.18	0.79
50 μM	23.69	1.25	18.94	0.82	18.38	0.85	19.3	0.92
100 μM	32.21	1.84	25.38	1.29	24.69	1.36	26.18	1.32
O2.- production rate.	WT		OE-3		OE-5		OE-6
0 μM	22.59	1.43	23.42	1.28	22.92	1.42	22.68	1.35
50 μM	26.39	1.67	23.65	1.53	23.16	1.64	23.17	1.43
100 μM	39.46	1.86	28.46	1.75	29.35	1.37	30.24	1.68
		WT		OE-3		OE-5		OE-6
SOD	0 μM	86.89	2.42	82.39	2.23	85.93	2.34	89.19	2.84
	50 μM	60.24	2.39	74.83	2.25	75.33	2.42	65.12	2.34
	100 μM	40.45	2.65	69.45	2.32	60.48	2.53	69.98	2.68
		WT		OE-3		OE-5		OE-6
APX	0 μM	25.99	1.73	26.82	1.84	24.5	1.88	27.18	1.79
	50 μM	17.94	1.86	21.49	0.87	28.82	0.69	29.17	0.68
	100 μM	9.49	0.78	16.76	1.03	19.39	0.84	17.89	0.66
		WT		OE-3		OE-5		OE-6
POD	0 μM	38.92	2.43	35.29	2.93	39.2	2.65	37.36	2.55
	50 μM	40.34	2.35	69.34	2.08	60.38	2.46	62.96	1.88
	100 μM	45.29	2.34	82.97	2.34	93.28	2.01	87.93	2.13
		WT		OE-3		OE-5		OE-6
CAT	0 μM	6.24	0.52	7.82	0.64	6.21	0.83	7.33	0.94
	50 μM	7.34	0.83	9.59	0.79	8.94	0.87	8.58	0.85
	100 μM	8.22	0.82	11.39	0.84	12.43	0.96	10.67	0.79
NtSOD		WT		OE-3		OE-5		OE-6
	0 μM MV	1	0.05	0.93	0.08	1.03	0.06	0.89	0.05
	50 μM MV	0.87	0.08	0.91	0.14	1.18	0.12	1.25	0.09
	100 μM MV	0.76	0.07	1.23	0.06	1.52	0.11	1.47	0.08
NtCAT1		WT		OE-3		OE-5		OE-6
	0 μM MV	1	0.06	0.93	0.09	1.01	0.07	0.88	0.06
	50 μM MV	1.496	0.06	1.15	0.13	1.03	0.11	0.97	0.05
	100 μM MV	2.2129	0.09	1.5995	0.08	1.35	0.14	1.62	0.07
NtAPX1		WT		OE-3		OE-5		OE-6
	0 μM MV	1	0.04	1.177	0.07	1.082	0.03	1.2415	0.04
	50 μM MV	1.2729	0.06	1.2749	0.05	1.3927	0.024	1.2394	0.045
	100 μM MV	1.6867	0.07	1.2467	0.06	1.2616	0.0385	1.1274	0.039
NtAPX2		WT		OE-3		OE-5		OE-6
	0 μM MV	1	0.04	1.18	0.051	1.27	0.024	1.0537	0.027
	50 μM MV	0.9582	0.035	1.2428	0.035	1.382	0.053	1.2794	0.032
	100 μM MV	0.93628	0.052	1.4382	0.042	1.783	0.023	1.579	0.024
NtGPX		WT		OE-3		OE-5		OE-6
	0 μM MV	1	0.024	1.136	0.027	1.275	0.031	0.957	0.031
	50 μM MV	1.12	0.025	1.297	0.021	1.483	0.047	1.135	0.022
	100 μM MV	1.234	0.047	1.373	0.019	1.835	0.038	1.658	0.024
NtCA		WT		OE-3		OE-5		OE-6
	0 μM MV	1	0.025	1.067	0.031	1.1829	0.027	0.9618	0.019
	50 μM MV	0.936	0.027	0.946	0.017	0.97	0.032	0.937	0.026
	100 μM MV	0.6893	0.021	0.768	0.018	0.882	0.036	0.793	0.027
NtRBOH		WT		OE-3		OE-5		OE-6
	0 μM MV	1	0.018	1.345	0.02	1.4567	0.04	1.39876	0.042
	50 μM MV	1.1589	0.027	1.783	0.03	2.036	0.037	1.853	0.018
	100 μM MV	1.2189	0.022	2.87623	0.042	2.284	0.024	2.096	0.028
